# Supplementary material for: Systemic high-mobility group box 1 administration suppresses skin inflammation by inducing an accumulation of PDGFRα+ mesenchymal cells from bone marrow
Source: PubMed Central journal article supplement (PMC4457135; doi:10.1038/srep11008), 2015-06-05
Supplement: srep11008-s1.pdf [file srep11008-s1.pdf]

Supplementary Information for

**Systemic high mobility group box 1 administration suppresses skin inflammation  
by inducing an accumulation of PDGFR $\alpha$ <sup>+</sup> mesenchymal cells from bone marrow**

Eriko Aikawa<sup>1</sup>, Ryo Fujita<sup>2</sup>, Yasushi Kikuchi<sup>1</sup>, Yasufumi Kaneda<sup>2</sup>, and Katsuto Tamai<sup>1\*</sup>

*<sup>1</sup>Department of Stem Cell Therapy Science and <sup>2</sup>Division of Gene Therapy Science,*

*Graduate School of Medicine, Osaka University, Japan*

\* Corresponding author: tamai@gts.med.osaka-u.ac.jp

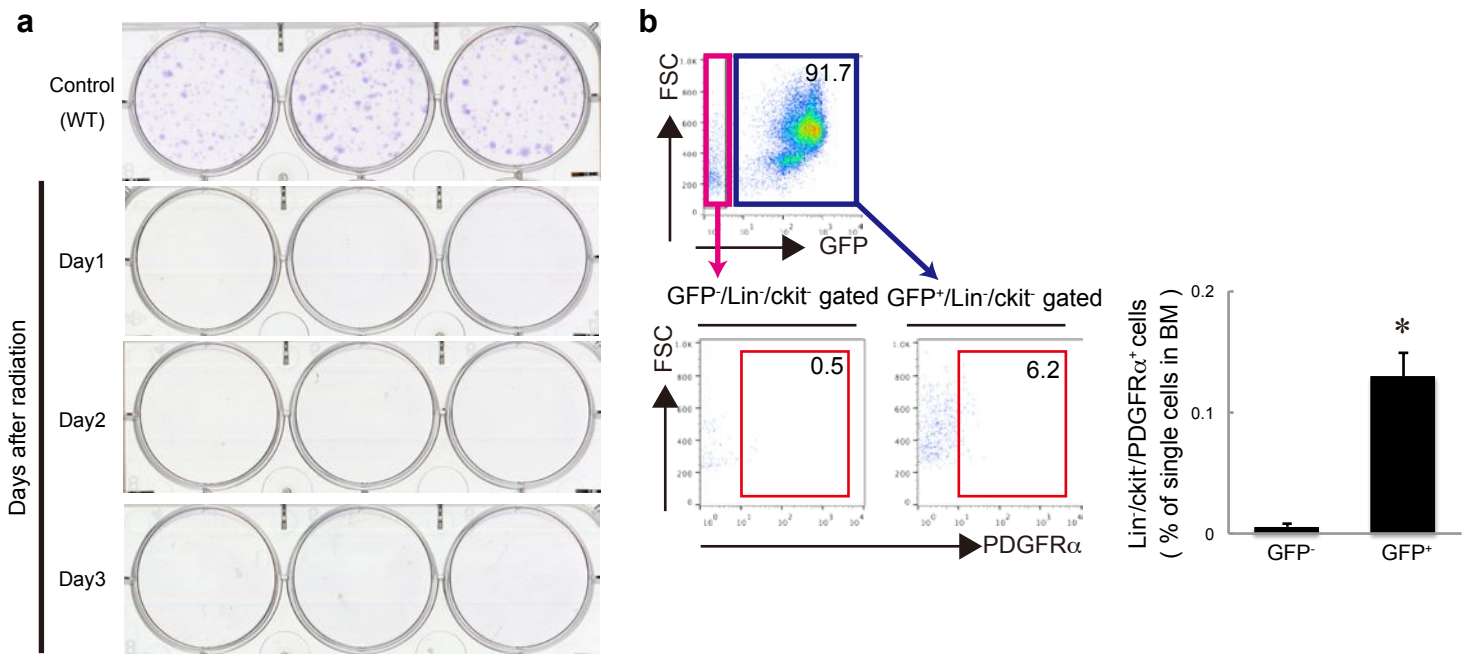

Figure S1. The GFP-BMT model was analyzed by CFU assay and flow cytometry. (a): Colony-forming unit (CFU) assay for bone marrow cells (BMCs) of wild type mice before and after irradiation. (b): Flow cytometry analysis of BMCs in GFP-BMT mice. The percentages of Lin<sup>-</sup>/ckit/PDGFR $\alpha$ <sup>+</sup> cells among GFP<sup>+</sup> or GFP<sup>-</sup> cells are shown in the right panel.

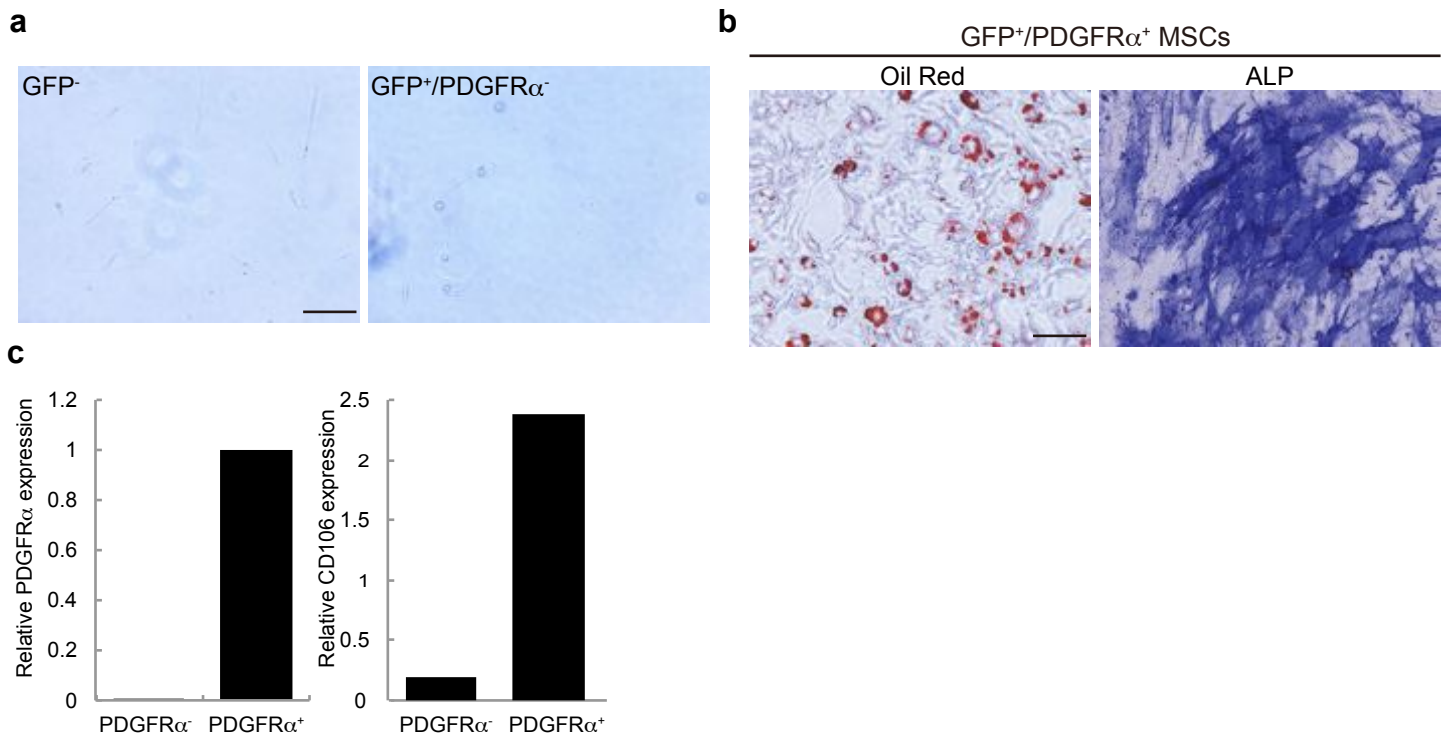

Figure S2. GFP<sup>+</sup>/PDGFR $\alpha$ <sup>+</sup> cells in skin grafts have some characteristics of MSCs. (a): Representative pictures of GFP<sup>-</sup> cells and GFP<sup>+</sup>/PDGFR $\alpha$ <sup>-</sup> cells isolated from skin grafts. (b): Oil-red staining and ALP staining. (c): The expressions of PDGFR $\alpha$  and CD106 in sorted cells from skin grafts. Bar = 200  $\mu$ m.

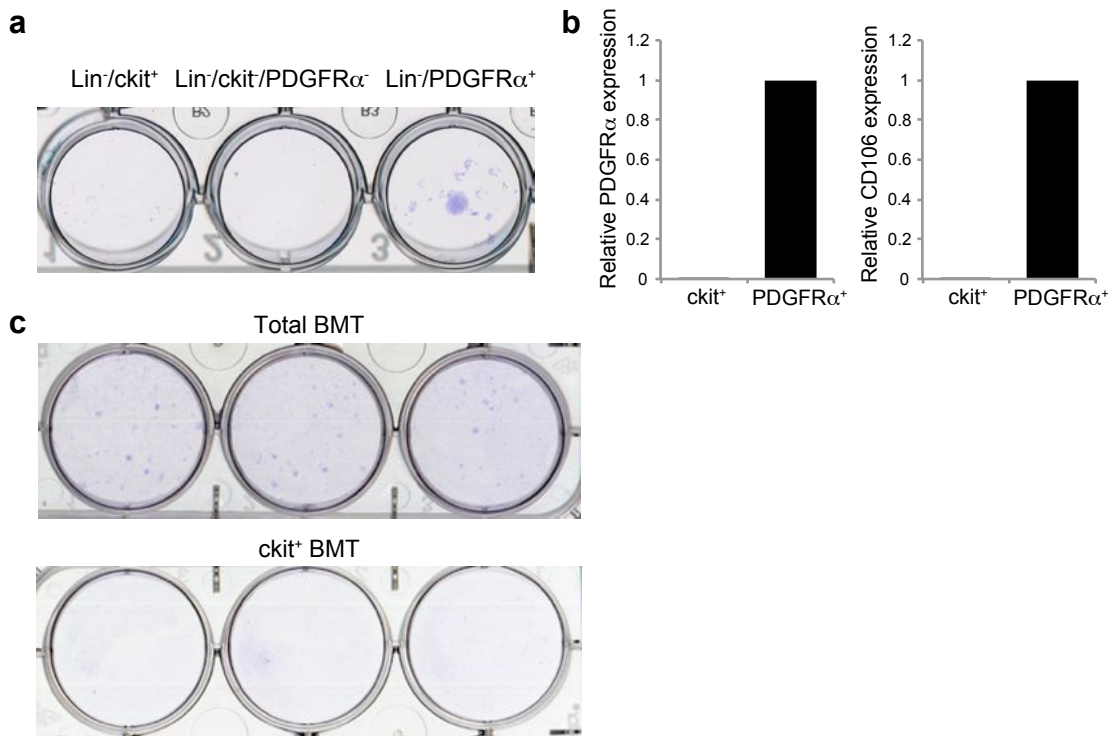

Figure S3. ckit<sup>+</sup> BM cells did not include PDGFR $\alpha$ <sup>+</sup> mesenchymal cells. (a): CFU assay for freshly isolated BMCs. BMCs were FACS sorted to Lin<sup>-</sup>/ckit<sup>+</sup> cells, Lin<sup>-</sup>/PDGFR $\alpha$ <sup>+</sup> cells, and Lin<sup>-</sup>/ckit<sup>-</sup>/PDGFR $\alpha$ <sup>-</sup> cells. (b): The expressions of PDGFR $\alpha$  and CD106 in sorted BMCs. (c): Results of the CFU assay for BMCs in BMT mice.

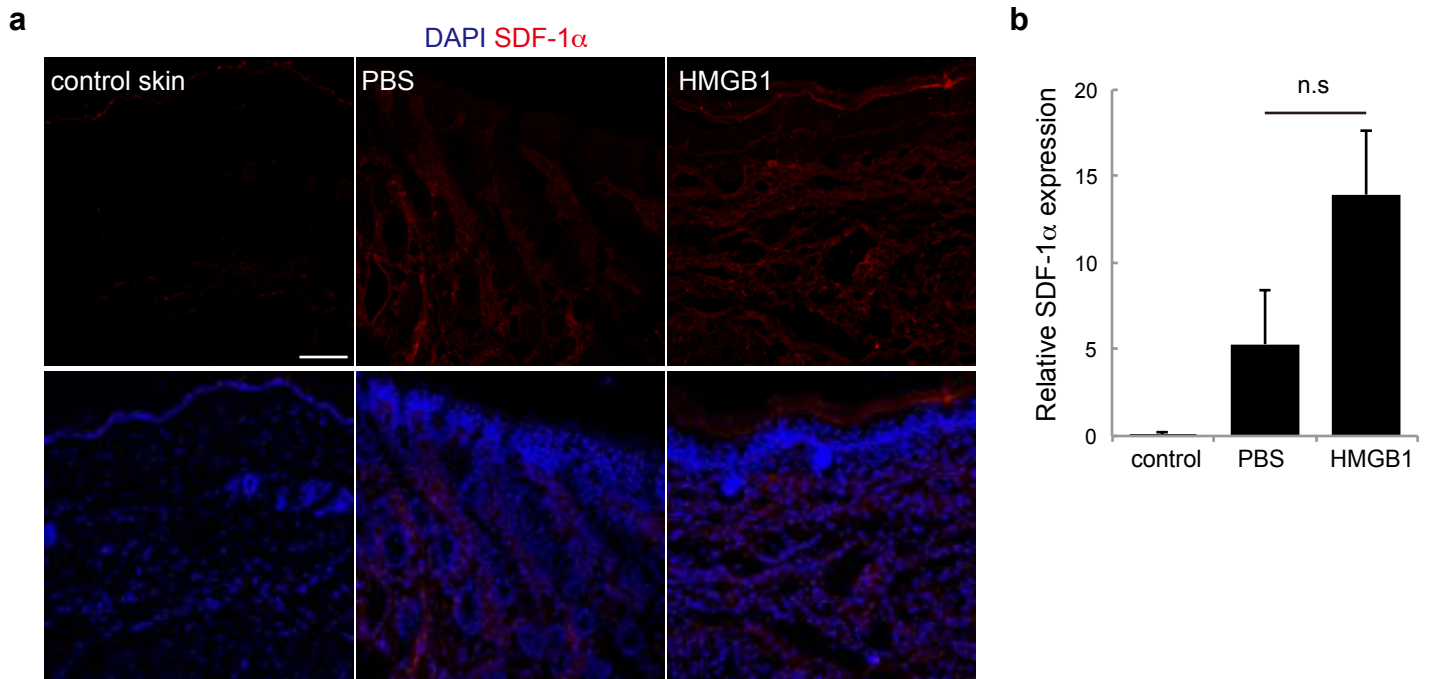

Figure S4. Skin grafts expressed SDF-1 $\alpha$ . (a): Representative images of skin grafts stained for SDF-1 $\alpha$ .

Nuclei were stained with DAPI. Bar = 200  $\mu$ m. (b): The expressions of SDF-1 $\alpha$  in skin grafts with or without HMGB1 administration.
